# Supplementary material
Source: PubMed Central journal article supplement (PMC7209956)
Supplement: rstb20190411supp8.pdf [file rstb20190411supp8.pdf]

**Supplemental Table S1.** Primers used in this study.

| Primer Name | Gene name (AGI)       | Primer sequence (5' > 3') | Amplicon length (bp) | Notes                                            |
|-------------|-----------------------|---------------------------|----------------------|--------------------------------------------------|
| AOX1a_F     | AOX1a (AT3G22370)     | GACGGTCCGTACGGTTTCG       | 175                  | qRT-PCR primer for <i>AOX1a</i>                  |
| AOX1a_R     |                       | CTTCTGATTCGCGTCCTCCTCCT   |                      |                                                  |
| UPOX1_F     | UPOX1 (AT2G21640)     | AGAGGGTGAAGGATGATAACG     | 128                  | qRT-PCR primer for <i>UPOX1</i>                  |
| UPOX1_R     |                       | GCTCCCGAATATCTTGTCCA      |                      |                                                  |
| UGT74E2_F   | UGT74E2 (AT1G05680)   | GAATCGTCTCATACCCGAAT      | 129                  | qRT-PCR primer for <i>UGT74E2</i>                |
| UGT74E2_R   |                       | GCTTTGGACCCATTTCAACA      |                      |                                                  |
| OM66_F      | OM66 (AT3G50930)      | TGCTGAGACCAGGACGTATG      | 128                  | qRT-PCR primer for <i>OM66</i>                   |
| OM66_R      |                       | ACCTTCCTCGATCTTGCTGA      |                      |                                                  |
| mtHSC70-1_F | mtHSC70-1 (AT4G37910) | TACTTGGCGAGACCTTCTG       | 124                  | qRT-PCR primer for <i>mtHSC70-1</i>              |
| mtHSC70-1_R |                       | CCGCATTCTCAATAACCCCT      |                      |                                                  |
| GDSL-like_F | GDSL-like (At5g13630) | CTACCGGAGTTTGTGTTGCC      | 91                   | qRT-PCR primer for <i>GDSL-like</i>              |
| GDSL-like_R |                       | TCGACCTCTTCCATAACGG       |                      |                                                  |
| DIN2_F      | DIN2 (AT3G60140)      | ACAACGACGACGGTACAAAA      | 125                  | qRT-PCR primer for <i>BUPS1</i>                  |
| DIN2_R      |                       | TCCTCTTACGTCACACCCAT      |                      |                                                  |
| ULP1B_F     | ULP1B (AT2G20570)     | ACCATCTCGACAACCAGT        | 123                  | qRT-PCR primer for <i>ULP1B</i>                  |
| ULP1B_R     |                       | TGACACTGAAGAAGCACGAA      |                      |                                                  |
| XTH21_F     | XTH21 (AT2G18800)     | CCGTGACCACCTTCTACTTG      | 126                  | qRT-PCR primer for <i>XTH21</i>                  |
| XTH21_R     |                       | CACCCCTTGCCTTGAGTGAA      |                      |                                                  |
| RHS15_F     | RHS15 (At5g08290)     | AAAATCCCCGGTGTGCT         | 121                  | qRT-PCR primer for <i>RHS15</i>                  |
| RHS15_R     |                       | ACAGGTACTCTCCTCCGATCAT    |                      |                                                  |
| PEX4_F      | PEX4 (AT5G25760)      | CTGCGACTCAGGGAATCTTCTA    | 61                   | qRT-PCR primer for <i>PEX4</i> – reference gene  |
| PEX4_R      |                       | TTGTGCCATTGAATTGAACCC     |                      |                                                  |
| UBQ10_F     | UBQ10 (AT4G05320)     | GTGGAAAGCTCCGACACC        | 88                   | qRT-PCR primer for <i>UBQ10</i> – reference gene |
| UBQ10_R     |                       | CGAAGATGAGACGCTGCTG       |                      |                                                  |
