# Supplementary material
Source: PubMed Central journal article supplement (PMC7209956)
Supplement: rstb20190411supp9.pdf [file rstb20190411supp9.pdf]

**Supplemental Table S2.** *nac017*-dependent retrograde signaling genes

| AGI       | p-value | Adjusted p-value | FC WT_AA vs WT_Control | FC <i>rao2</i> _AA vs WT_AA | FC <i>nac017</i> _AA vs WT_AA |
|-----------|---------|------------------|------------------------|-----------------------------|-------------------------------|
| AT2G04050 | 4E-05   | 3E-03            | 5.53                   | 4.53                        | 5.86                          |
| AT1G74870 | 4E-06   | 2E-03            | 4.49                   | 4.33                        | 5.12                          |
| AT2G47520 | 6E-06   | 2E-03            | 5.03                   | 4.13                        | 4.59                          |
| AT4G33070 | 3E-04   | 5E-03            | 3.98                   | 3.82                        | 3.56                          |
| AT1G05680 | 5E-04   | 7E-03            | 4.11                   | 3.81                        | 2.36                          |
| AT1G17180 | 3E-03   | 2E-02            | 4.11                   | 3.71                        | 3.67                          |
| AT2G21640 | 3E-05   | 3E-03            | 4.37                   | 3.67                        | 4.16                          |
| AT5G51440 | 1E-02   | 3E-02            | 1.45                   | 3.66                        | 4.10                          |
| AT2G41730 | 2E-04   | 5E-03            | 4.43                   | 3.60                        | 3.73                          |
| AT2G03760 | 2E-04   | 5E-03            | 4.84                   | 3.56                        | 3.67                          |
| AT5G40690 | 7E-06   | 3E-03            | 4.94                   | 3.36                        | 3.50                          |
| AT1G78340 | 5E-04   | 6E-03            | 4.04                   | 3.31                        | 3.51                          |
| AT5G42830 | 2E-06   | 2E-03            | 4.98                   | 3.29                        | 3.89                          |
| AT4G17260 | 3E-06   | 2E-03            | 3.44                   | 3.29                        | 3.62                          |
| AT2G35480 | 6E-05   | 3E-03            | 2.65                   | 3.04                        | 2.74                          |
| AT1G10170 | 3E-06   | 2E-03            | 3.97                   | 3.02                        | 3.08                          |
| AT1G32870 | 2E-05   | 3E-03            | 3.79                   | 2.85                        | 2.85                          |
| AT2G46310 | 2E-04   | 5E-03            | 2.60                   | 2.80                        | 2.42                          |
| AT4G27585 | 3E-04   | 5E-03            | 2.29                   | 2.61                        | 3.03                          |
| AT1G71330 | 1E-05   | 3E-03            | 3.63                   | 2.57                        | 2.43                          |
| AT1G24090 | 2E-04   | 5E-03            | 2.74                   | 2.56                        | 2.03                          |
| AT2G04040 | 8E-04   | 8E-03            | 3.98                   | 2.54                        | 2.56                          |
| AT2G36790 | 7E-05   | 4E-03            | 4.45                   | 2.46                        | 2.03                          |
| AT3G61630 | 1E-05   | 3E-03            | 4.93                   | 2.45                        | 2.44                          |
| AT5G43450 | 2E-04   | 5E-03            | 3.68                   | 2.45                        | 2.26                          |
| AT2G36750 | 1E-03   | 1E-02            | 2.74                   | 2.43                        | 1.94                          |
| AT3G55620 | 3E-05   | 3E-03            | 2.11                   | 2.30                        | 2.61                          |
| AT5G65110 | 3E-05   | 3E-03            | 3.16                   | 2.26                        | 2.21                          |
| AT5G59510 | 2E-04   | 5E-03            | 4.35                   | 2.25                        | 1.23                          |
| AT5G64230 | 2E-03   | 1E-02            | 2.44                   | 2.09                        | 1.58                          |
| AT5G15090 | 2E-04   | 4E-03            | 1.49                   | 2.08                        | 2.77                          |
| AT4G27940 | 2E-05   | 3E-03            | 2.66                   | 2.07                        | 2.19                          |
| AT3G08590 | 4E-04   | 6E-03            | 1.47                   | 2.02                        | 2.44                          |
| AT2G47000 | 1E-05   | 3E-03            | 4.98                   | 1.96                        | 1.55                          |
| AT5G56350 | 1E-04   | 4E-03            | 1.83                   | 1.92                        | 2.05                          |
| AT2G47010 | 2E-03   | 1E-02            | 1.79                   | 1.87                        | 2.21                          |
| AT1G32940 | 6E-04   | 7E-03            | 2.64                   | 1.87                        | 1.77                          |
| AT4G17080 | 9E-05   | 4E-03            | 1.75                   | 1.85                        | 2.07                          |
| AT4G37910 | 8E-05   | 4E-03            | 1.15                   | 1.85                        | 2.16                          |
| AT1G54120 | 1E-03   | 9E-03            | 1.27                   | 1.84                        | 2.03                          |
| AT5G05190 | 6E-04   | 7E-03            | 2.60                   | 1.82                        | 1.57                          |
| AT5G01550 | 2E-05   | 3E-03            | 4.36                   | 1.76                        | 2.34                          |
| AT4G37370 | 3E-06   | 2E-03            | 5.08                   | 1.71                        | 1.12                          |
| AT1G14040 | 3E-04   | 5E-03            | 2.14                   | 1.71                        | 1.40                          |
| AT5G55200 | 3E-04   | 5E-03            | 1.46                   | 1.66                        | 1.47                          |
| AT1G43910 | 5E-05   | 3E-03            | 1.92                   | 1.61                        | 1.96                          |
| AT3G03870 | 5E-05   | 3E-03            | 2.50                   | 1.56                        | 1.51                          |
| AT1G32230 | 5E-05   | 3E-03            | 1.26                   | 1.55                        | 1.37                          |
| AT1G76560 | 1E-03   | 9E-03            | 2.03                   | 1.53                        | 1.49                          |
| AT4G36110 | 1E-03   | 9E-03            | 1.20                   | 1.52                        | 1.28                          |
| AT4G05020 | 3E-03   | 2E-02            | 2.30                   | 1.51                        | 1.51                          |
| AT1G64160 | 4E-03   | 2E-02            | 3.35                   | 1.50                        | 2.07                          |
| AT3G47340 | 2E-02   | 5E-02            | 4.14                   | 1.45                        | 1.35                          |
| AT1G69550 | 4E-04   | 6E-03            | 1.67                   | 1.42                        | 1.56                          |
| AT1G22400 | 1E-03   | 1E-02            | 1.42                   | 1.37                        | 0.71                          |
| AT1G05060 | 1E-03   | 9E-03            | 1.57                   | 1.36                        | 1.38                          |
| AT2G34500 | 2E-03   | 1E-02            | 3.34                   | 1.36                        | 1.17                          |
| AT1G10585 | 1E-02   | 4E-02            | 1.37                   | 1.36                        | 1.21                          |
| AT3G11020 | 2E-04   | 5E-03            | 1.25                   | 1.34                        | 1.46                          |

|           |       |       |      |      |      |
|-----------|-------|-------|------|------|------|
| AT1G23550 | 3E-06 | 2E-03 | 3.48 | 1.34 | 1.07 |
| AT4G03320 | 6E-03 | 3E-02 | 1.29 | 1.29 | 1.00 |
| AT5G09570 | 1E-02 | 3E-02 | 2.09 | 1.29 | 2.35 |
| AT1G21390 | 7E-03 | 3E-02 | 1.29 | 1.25 | 0.83 |
| AT2G38240 | 5E-03 | 2E-02 | 1.52 | 1.25 | 1.98 |
| AT3G22850 | 1E-04 | 4E-03 | 1.68 | 1.24 | 1.78 |
| AT2G41380 | 1E-04 | 4E-03 | 2.78 | 1.24 | 1.01 |
| AT5G14730 | 4E-06 | 2E-03 | 4.74 | 1.24 | 1.14 |
| AT2G05710 | 2E-04 | 5E-03 | 1.05 | 1.24 | 1.49 |
| AT4G00234 | 2E-04 | 5E-03 | 1.21 | 1.22 | 0.76 |
| AT2G25140 | 5E-03 | 2E-02 | 1.15 | 1.22 | 1.42 |
| AT2G16060 | 1E-04 | 4E-03 | 2.58 | 1.21 | 1.34 |
| AT1G61820 | 6E-03 | 2E-02 | 1.37 | 1.20 | 0.69 |
| AT2G30250 | 2E-04 | 5E-03 | 3.56 | 1.19 | 1.11 |
| AT5G19550 | 8E-04 | 8E-03 | 1.17 | 1.19 | 1.37 |
| AT4G35770 | 8E-03 | 3E-02 | 4.63 | 1.18 | 1.14 |
| AT1G74750 | 6E-04 | 7E-03 | 1.71 | 1.17 | 0.84 |
| AT3G50930 | 3E-04 | 6E-03 | 5.30 | 1.16 | 1.32 |
| AT3G03680 | 1E-04 | 4E-03 | 1.26 | 1.14 | 2.39 |
| AT3G46660 | 5E-03 | 2E-02 | 2.17 | 1.13 | 1.08 |
| AT3G46600 | 4E-04 | 6E-03 | 2.22 | 1.13 | 0.65 |
| AT3G06500 | 8E-05 | 4E-03 | 2.33 | 1.13 | 1.10 |
| AT4G00900 | 6E-04 | 7E-03 | 1.81 | 1.12 | 1.08 |
| AT1G42990 | 4E-05 | 3E-03 | 2.88 | 1.10 | 1.05 |
| AT1G07520 | 6E-05 | 3E-03 | 3.09 | 1.09 | 0.75 |
| AT1G17290 | 2E-05 | 3E-03 | 1.74 | 1.09 | 1.06 |
| AT2G33480 | 1E-03 | 1E-02 | 1.69 | 1.08 | 1.50 |
| AT4G19810 | 5E-04 | 6E-03 | 2.00 | 1.08 | 1.14 |
| AT2G34070 | 2E-03 | 1E-02 | 2.00 | 1.08 | 0.66 |
| AT3G55450 | 4E-04 | 6E-03 | 2.17 | 0.99 | 0.99 |
| AT3G25250 | 2E-07 | 2E-03 | 5.44 | 0.98 | 1.31 |
| AT5G03030 | 6E-04 | 7E-03 | 1.12 | 0.97 | 0.74 |
| AT2G45170 | 1E-04 | 4E-03 | 2.86 | 0.95 | 1.12 |
| AT3G22370 | 5E-05 | 3E-03 | 3.22 | 0.93 | 0.92 |
| AT5G33290 | 1E-03 | 1E-02 | 1.45 | 0.90 | 0.70 |
| AT2G15490 | 1E-04 | 4E-03 | 4.25 | 0.89 | 0.64 |
| AT5G43460 | 6E-05 | 3E-03 | 1.50 | 0.88 | 1.00 |
| AT5G58070 | 4E-03 | 2E-02 | 1.37 | 0.88 | 0.85 |
| AT5G12030 | 4E-03 | 2E-02 | 3.44 | 0.87 | 0.64 |
| AT1G02750 | 7E-05 | 3E-03 | 1.39 | 0.86 | 0.92 |
| AT3G03270 | 5E-04 | 6E-03 | 1.29 | 0.85 | 0.85 |
| AT1G33420 | 6E-05 | 3E-03 | 1.20 | 0.84 | 0.96 |
| AT4G37010 | 2E-04 | 5E-03 | 2.22 | 0.80 | 0.98 |
| AT3G56710 | 2E-04 | 5E-03 | 3.73 | 0.77 | 0.97 |
| AT5G60800 | 1E-04 | 4E-03 | 2.53 | 0.76 | 0.80 |
| AT5G44390 | 9E-03 | 3E-02 | 1.14 | 0.74 | 1.46 |
| AT5G38900 | 2E-03 | 1E-02 | 2.35 | 0.73 | 1.05 |
| AT3G10930 | 1E-04 | 4E-03 | 4.27 | 0.73 | 0.80 |
| AT5G57480 | 1E-03 | 1E-02 | 1.24 | 0.71 | 0.91 |
| AT1G03090 | 1E-02 | 3E-02 | 2.13 | 0.68 | 0.77 |
| AT4G04960 | 2E-05 | 3E-03 | 2.31 | 0.66 | 0.87 |
| AT5G06870 | 2E-03 | 1E-02 | 1.93 | 0.65 | 1.01 |
| AT5G61160 | 1E-02 | 4E-02 | 2.03 | 0.63 | 1.19 |
| AT1G44350 | 1E-03 | 1E-02 | 2.14 | 0.62 | 0.74 |
| AT5G46050 | 9E-03 | 3E-02 | 1.39 | 0.61 | 0.64 |

---
